## Erratum

### **No Differences in Renal Function between Balanced 6% Hydroxyethyl Starch (130/0.4) and 5% Albumin for Volume Replacement Therapy in Patients Undergoing Cystectomy: A Randomized Controlled Trial: Erratum**

In the article beginning on page 67 in the January 2018 issue, Dr. Pagel's name was listed incorrectly in the byline. It should have appeared as Judith-Irina Pagel, M.D.

The authors regret this error. The online version and PDF of the article have been corrected.

#### **Reference**

Kammerer T, Brettner F, Hilferink S, Hulde N, Klug F, Pagel J, Karl A, Crispin A, Hofmann-Kiefer K, Conzen P, Rehm M: No differences in renal function between balanced 6% hydroxyethyl starch (130/0.4) and 5% albumin for volume replacement therapy in patients undergoing cystectomy: A randomized controlled trial. *ANESTHESIOLOGY* 2018; 128:67–78
